# Supplementary material for: A robust energy framework for powering self-sufficient and zero-carbon infrastructure in high-altitude regions
Source: Research Square preprint supplement (doi:10.21203/rs.3.rs-8249699/v1), 2025-12-10
Supplement: Supplementary file 1 [file 7de15ac2d333582fef6333c0.docx]

Supplementary information for

**A robust energy framework for powering self-sufficient and zero-carbon infrastructure in high-altitude regions**

Bowen Guan,1,* Xin Fu,1 Xiaohua Liu,2 Tao Zhang,2 and Jiangyan Ma,3 Xinke Wang1

1School of Human Settlements and Civil Engineering, Xi'an Jiaotong University, Xi’an, Shaanxi 710049, China

2Department of Building Science, Tsinghua University, Beijing 100084, China

3China Railway First Survey and Design Institute Group Co., Ltd., Xi’an, Shaanxi 710054, China

1Lead contact

*Correspondence: guanbw@xjtu.edu.cn

**Rooftop PV Power Generation Experimental Platform**

In this study, a rooftop photovoltaic (PV) power generation experimental platform was established in Shannan, on the Qinghai–Tibet Plateau, at an altitude of 3570 m. The system configuration is illustrated in Supplementary Figure 1. The experimental structure covers a floor area of 21.6 m². The rooftop PV system was designed with reference to the roof plans of high-altitude railway stations, incorporating optimizations for power generation efficiency and snow prevention. The PV panels are oriented due south with a tilt angle of 25°. The system employs five LR5-72HPH-550W PV panels, covering a total area of 15 m², with a total installed capacity of 2.75 kW. For indoor heating, electric heating films with a rated power of 220 W/m² are used as the terminal heating elements. The energy storage module consists of a lithium battery with a capacity of 12 V, 200 Ah, and 2.4 kWh. In addition, an energy storage layer made of phase change material (PCM) is installed in the floor. The PCM has a total mass of 150.5 kg, a phase transition temperature range of 20–28 °C, a thickness of 25 mm, a latent heat value of 200 kJ/kg, and a density of 860 kg/m³.

**Supplementary Figure 1 Configuration of the rooftop PV system.**

The experimental platform is powered by both rooftop PV panels and the utility grid, as shown in Supplementary Figure 1. During periods of sufficient solar radiation, the rooftop PV system generates electricity to supply the building, with any surplus energy stored in the lithium battery. When solar radiation is insufficient, the system prioritizes the use of energy stored in the battery to power the building until the battery reaches its lower state-of-charge (SOC) limit, after which power is drawn from the utility grid. The experimental objectives are twofold: first, to conduct field measurements of the rooftop PV power generation efficiency and hourly energy output in the local high-altitude environment; and second, to validate the feasibility of the PV-based energy system in the context of a high-altitude station, demonstrating the zero-carbon potential of the proposed system. As an illustrative example, detailed experimental results for a typical heating month (January 2023) are presented in Supplementary Figure 2.

**Supplementary Figure 2. Experimental results of the rooftop PV platform during typical days in the heating season.
a** Power balance of the experimental platform
**b** Solar irradiance
**c** Battery state of charge (SOC)
**d** Outdoor and indoor air temperatures
**e** Daily self-sufficiency rate (SSR) performance during a typical month in the heating season
**f** Daily self-consumption rate (SCR) performance during a typical month in the heating season

**Muti-objective Optimization for Smart Operation**

This study proposes a two-stage optimization model to simultaneously address the long-term capacity planning and short-term operational scheduling of the PVB-V2B system. The framework is uniquely driven by forecasted passenger flow dynamics, translating ticketing data and weather forecasts into actionable energy management strategies. The overall solution methodology is outlined in Fig. 6a, with the detailed algorithmic steps elaborated below.

The problem is characterized by three conflicting objectives—maximizing SSR, SCR, and NPV—coupled with a combinatorially complex capacity planning stage. To address this, the Many-Objective Evolutionary Algorithm NSGA-III is employed, which offers enhanced performance in preserving population diversity and ensuring convergence in many-objective search spaces. This capability stems from its niche-preservation operator leveraging a set of well-distributed reference points. Subsequent to the derivation of the Pareto-optimal solution set, the Technique for Order Preference by Similarity to Ideal Solution (TOPSIS) is utilized for final decision-making. By quantifying the proximity to an ideal solution and remoteness from a negative-ideal solution, TOPSIS enables a rational and transparent selection of a single scheduling plan from the non-dominated alternatives, contingent upon the specified decision-maker weights. The solution process for the integrated two-stage problem is implemented through the following sequential steps:

**Step 1: Problem Initialization and Population Generation**
The solution procedure begins with the initialization of the NSGA-III algorithm, where critical parameters such as the population size and the set of reference points are defined. Each individual in the population is encoded using a mixed representation to capture both stages of the optimization problem: the first-stage capacity planning variables—including the number of unidirectional charging piles and the rated capacity of the stationary battery—are encoded as integers and continuous variables, respectively, while the second-stage operational variables, consisting of the 24-hour hourly charge/discharge power of the battery and the V2B charging power, are represented as continuous vectors. An initial parent population is randomly generated, and a dedicated feasibility check is performed to ensure that all operational profiles adhere to the constraints derived from the capacity variables, such as the maximum power limits of the charging piles and the state-of-charge boundaries of the battery; any solution violating these constraints is discarded and regenerated until a complete feasible initial population is obtained.

**Step 2: Fitness Evaluation via Integrated Two-Stage Simulation**
In this step, the fitness of each individual is evaluated by simulating its encoded operational strategy over a typical day, using forecasted data including passenger flow, building load, V2B charging potential, and PV generation. The simulation computes the hourly power balance, determining the grid electricity import and enabling the calculation of the three objective functions: the total grid energy consumption (reflecting zero-carbon performance), the total on-site PV self-consumption, and the economic objective, expressed as the net present value, which incorporates both the operational cost savings and the annualized investment costs of the first-stage capacity decisions. This integrated evaluation ensures that the operational performance is always assessed in the context of the underlying infrastructure configuration.

**Step 3: Evolutionary Optimization and Offspring Generation**
The evaluated population then proceeds through the evolutionary operations of NSGA-III. Individuals are classified into non-domination ranks and selectively retained based on their rank and niche count relative to the predefined reference points, a mechanism essential for maintaining diversity across the three objectives. A mating pool is formed via tournament selection, and new offspring are generated through crossover and mutation operations designed to handle the mixed variable types. Each newly created offspring undergoes a feasibility verification to ensure compliance with all operational constraints; if violations are detected, the variation operations are repeated until a feasible offspring is produced, thereby maintaining the integrity of the population throughout the search process.

**Step 4: Iterative Search and Final Decision-Making**
Steps 2 and 3 are repeated iteratively until the maximum number of generations is reached, at which point the algorithm converges to a Pareto-optimal set of non-dominated solutions. This set represents the best possible trade-offs among the three conflicting objectives. To select a single implementable solution from this set, the TOPSIS method is applied. The Pareto-optimal solutions are normalized, and their Euclidean distances to the ideal and negative-ideal solutions are computed. The solution with the highest relative closeness to the ideal point is selected as the final best-compromise solution, providing a clear and justified decision that integrates both the long-term capacity plan and the short-term operational schedule.

**Supplementary Table 1 Parameter list of candidate devices.**

| Device | Lifetime | Investment |
| --- | --- | --- |
| Rooftop PV system [1,2] | 20 years | 570 US$/kWp |
| Lithium battery [3,4] | 10 years | 140 US$/kWh |
| Electrolyser [5] | 20 years | 280 US$/kW |
| Hydrogen storage tank [5] | 20 years | 420 US$/kg |
| Hydrogen-oxygen fuel cell [5] | 20 years | 840 US$/kW |
| EV charger | 10 years | 180 US$/unit |
| Underground pit thermal energy storage | 20 years | 250 US$/kWh |

**Supplementary References**

1. Cui, Y., Ji D., Liu W., Cheng Y., & Cai L. Research on the cost of distributed photovoltaic plant of China based on whole life cycle perspective. *IEEE Access* **7**: 89379-89389 (2019).
2. Wang, K. et al. Full life cycle management of power system integrated with renewable energy: Concepts, developments and perspectives. *Frontiers in Energy Research* **9**, 680355 (2021).
3. Zhang, Y., Ma T., Campana P. E., Yamaguchi Y., & Dai Y. A techno-economic sizing method for grid-connected household photovoltaic battery systems. *Applied Energy* **269**, 115106 (2020).
4. Rosati, A., Facci A. L., & Ubertini S. Techno-economic analysis of battery electricity storage towards self-sufficient buildings. *Energy Conversion and Management* **256**, 115313 (2022).
5. Wang, Y. et al. Synergistic planning of an integrated energy system containing hydrogen storage with the coupled use of electric-thermal energy. *International Journal of Hydrogen Energy* **48**, 15154–15178 (2023).
